# Supplementary material for: Parental Self-Efficacy and Child Diet Quality between Ages 2 and 5: The STEPS Study
Source: MDPI journal article supplement (doi:10.3390/nu14224891), 2022-11-18
Supplement: s1 [file s1]

**Table S1.** Characteristics of STEPS study families. Comparison between participants (longitudinal data) and non-participants based on percentage and chi-square test for categorical variables and with means and t-test for continuous variables.

| Variable        |           | 2 years age point | Non-participants | Longitudinal sample <sup>1</sup> | p-value |
|-----------------|-----------|-------------------|------------------|----------------------------------|---------|
|                 |           | n = 580           | n = 307          | n = 273                          |         |
| <b>Children</b> |           |                   |                  |                                  |         |
| Sex             | Boy       | 312 (54%)         | 165 (54%)        | 147 (54%)                        | 0.98    |
|                 | Girl      | 268 (46%)         | 142 (46%)        | 126 (46%)                        |         |
| Siblings        | 0–1       | 484 (83%)         | 259 (84%)        | 225 (82%)                        | 0.53    |
|                 | 2 or more | 96 (17%)          | 48 (16%)         | 48 (18%)                         |         |
| Diet quality    |           | 6.10 ((1.69)      | 6.04 (1.78)      | 6.17 (1.59)                      | 0.33    |
| <b>Mothers</b>  |           |                   |                  |                                  |         |
| Age             | 17–29     | 229 (40%)         | 127 (42%)        | 102 (37%)                        | 0.31    |
|                 | 30–45     | 350 (60%)         | 179 (59%)        | 171 (63%)                        |         |
| Education       | Low       | 182 (32%)         | 102 (35%)        | 80 (30%)                         | 0.20    |
|                 | Advanced  | 384 (68%)         | 193 (65%)        | 191 (70%)                        |         |
| PSE             |           | 85.73 (8.45)      | 85.85 (8.55)     | 85.60 (8.35)                     | 0.73    |
| <b>Fathers</b>  |           |                   |                  |                                  |         |
| Age             | 17–29     | 157 (27%)         | 86 (28%)         | 71 (26%)                         | 0.59    |
|                 | 30–45     | 423 (73%)         | 221 (72%)        | 202 (74%)                        |         |
| Education       | Low       | 269 (48%)         | 140 (47%)        | 129 (48%)                        | 0.84    |
|                 | Advanced  | 295 (52%)         | 156 (53%)        | 139 (52%)                        |         |
| PSE             |           | 82.71 (10.13)     | 82.30 (10.96)    | 83.18 (9.10)                     | 0.30    |
| <b>Families</b> |           |                   |                  |                                  |         |
| Income          | <3000 EUR | 298 (54%)         | 156 (54%)        | 139 (51%)                        | 0.77    |
|                 | ≥3000 EUR | 252 (46%)         | 135 (46%)        | 133 (49%)                        |         |
| Education       | Low       | 133 (23%)         | 74 (25%)         | 59 (21%)                         | 0.38    |
|                 | Advanced  | 439 (77%)         | 225 (75%)        | 214 (79%)                        |         |
| PSE             |           | 84.22 (7.46)      | 84.07 (7.90)     | 84.39 (6.94)                     | 0.61    |

<sup>1</sup> Longitudinal sample = 2 years ja 5 years age points. STEPS, Steps to Healthy Development; PSE, parental self-efficacy.

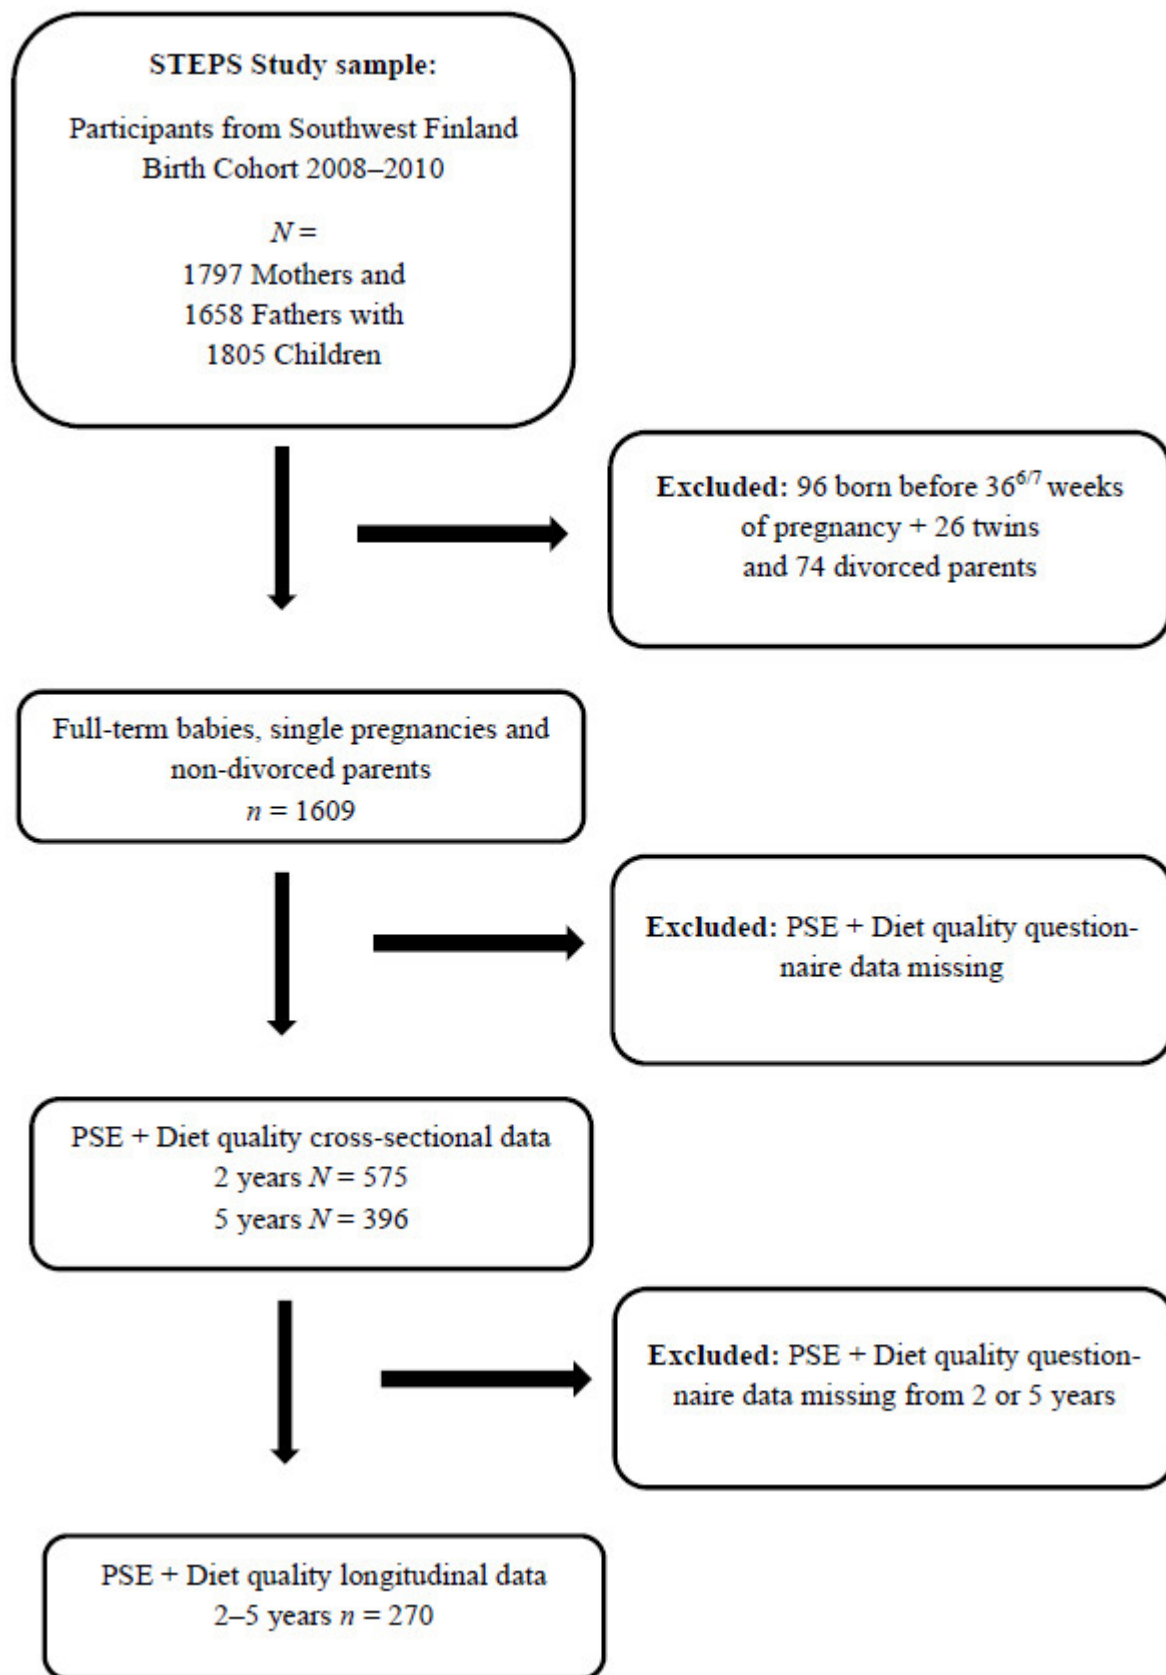

**Figure S1.** Flowchart of the study. STEPS, Steps to Healthy Development; PSE, parental self-efficacy.
